# Supplementary material
Source: Royal Society of Chemistry journal article supplement (doi:10.1039/d6cc01872f)
Supplement: d6cc01872f1.pdf [file d6cc01872f1.pdf]

## Supplementary Information

### **CeF<sub>3</sub>/Co<sub>3</sub>O<sub>4</sub> Heterojunction Enabled Reconstruction Regulation for Selective and Efficient Electrocatalytic Cleavage of Lignin C<sub>β</sub>-O-4 linkage**

Jialin Fan<sup>a</sup>, Jingxuan Zhang<sup>a</sup>, Wenjing Bai<sup>a</sup>, Zhaoling Ma<sup>b</sup>, Liyuan Gong<sup>a,\*</sup>, Yongzhuang Liu<sup>a,\*</sup>, Shuo Dou<sup>a,\*</sup>

*<sup>a</sup>State Key Laboratory of Utilization of Woody Oil Resource, Key Laboratory of Bio-Based Material Science and Technology of Ministry of Education, Northeast Forestry University, Hexing Road 26, Harbin, 150040, China*

*E-mail: [doushuo@nefu.edu.cn](mailto:doushuo@nefu.edu.cn); [lyz@nefu.edu.cn](mailto:lyz@nefu.edu.cn); [gly@nefu.edu.cn](mailto:gly@nefu.edu.cn)*

*<sup>b</sup>Guangxi Key Laboratory of Low Carbon Energy Materials, Guangxi Normal University, Guilin, 541004, China*

## Experimental section

### 1. Catalysts preparation and characterization

**Material.** Except noted, all chemicals were purchased and used without further purification. Deionized water was used throughout the experiments. Cobalt (II) nitrate hexahydrate ( $\text{Co}(\text{NO}_3)_2 \cdot 6\text{H}_2\text{O}$ , A.R.), cerium nitrate hexahydrate ( $\text{Ce}(\text{NO}_3)_3 \cdot 6\text{H}_2\text{O}$ , A.R.), urea ( $\text{CH}_4\text{N}_2\text{O}$ , A.R.), ammonium fluoride ( $\text{NH}_4\text{F}$ , AR), hydrochloric acid (HCl, 36.0%–38.0%), ethanol ( $\text{C}_2\text{H}_6\text{O}$ , A.R.), 2-phenoxyacetophenone (PP-one, 98%), ammonium chloride ( $\text{NH}_4\text{Cl}$ , A.R.) were purchased from Beijing InnoChem Science & Technology Co., Ltd. (China).

**Preparation of bulk  $\text{Co}_3\text{O}_4$  and  $\text{CeF}_3/\text{Co}_3\text{O}_4$ .** Nickel foam (NF) was used as matrix for growing  $\text{Co}_3\text{O}_4$  nanoneedle arrays. Before the hydrothermal process, NF ( $30 \times 30 \times 2$  mm) was ultrasonically cleaned by HCl, ethanol, and deionized water for 15 min to get rid of the possible surface dirt and oxide layer. Typically,  $\text{Co}(\text{NO}_3)_2 \cdot 6\text{H}_2\text{O}$  (6 mmol), urea (30 mmol), and  $\text{NH}_4\text{F}$  (0.2 g) were dissolved in deionized water (60 mL) under stirring to form a homogeneous solution. Then, the mixed solution with a clean NF was transformed into a Teflon-lined stainless-steel autoclave and maintained at 120 °C for 10 h. After cooling to room temperature, the substrate was taken out and cleaned with deionized water and ethanol several times before being fully dried at 60 °C. After annealing at 400 °C for 2h under air atmosphere,  $\text{Co}_3\text{O}_4$  was obtained.  $\text{CeF}_3/\text{Co}_3\text{O}_4$  were prepared by replacing 20% molar ration of  $\text{Co}(\text{NO}_3)_2 \cdot 6\text{H}_2\text{O}$  with  $\text{Ce}(\text{NO}_3)_3 \cdot 6\text{H}_2\text{O}$  under the same procedure.

**Characterizations.** The sample morphologies were characterized by SEM (ZEISS Sigma 360, Germany) and TEM (JEOL JEM–2100F, Japan). X-ray diffraction (XRD) was conducted in the  $2\theta$  range of 10–80° at a scan rate of 5 °/min with Cu–K $\alpha$  radiation (Rigaku Ultima IV, Japan). The X-ray photoelectron spectroscopy (XPS) was performed by Thermo Scientific K-Alpha (USA). Raman and in-situ Raman spectra were measured on a confocal microscope (Renishaw, England) equipped with a semiconductor laser ( $\lambda=785$  nm). Qualitative and quantitative analysis for lignin model cleavage products and lignin depolymerization products were carried out on gas chromatography-mass spectrometry (GC-MS, Agilent 7890A -5975C, HP-5MS column, USA) and gas chromatography (GC, Agilent 8860, HP-5 column, USA), respectively. Organosolv lignin, pre-oxidized lignin, and depolymerization product fractions were

characterized by HSQC NMR (Bruker Advance III HD 500 MHz, Switzerland). Gel permeation chromatography (GPC) of pre-oxidized lignin and depolymerization product fractions was conducted using THF as the mobile phase on a Waters 1525.

**Electrochemical measurements.** All electrochemical measurements were performed on an electrochemical workstation (CHI 660 E), and the performance of electrocatalysts was evaluated in a single cell by using a typical three-electrode system. In such a system, mixed electrolyte (2.5 mL ethanol, THF, and 5 mL 1M KOH) was employed, Pt foil and Ag/AgCl served as the counter and reference electrode. The LSV measurement was performed at a scan rate of 5 mV/s, and the potential in the LSV polarization curves was corrected by iR compensation at the level of 90%. EIS tests were conducted from 0.1 Hz to 100000Hz, and the results are presented in the form of a Bode phase plot.

## 2. Synthesis of Lignin $\beta$ -O-4 Model Compounds

$\beta$ -O-4 ketone models were prepared following previously reported procedures.<sup>1</sup> The substrates utilized in this work were synthesized via two steps from the corresponding phenolic compounds (phenol, guaiacol, 2,6-dimethoxyphenol) and bromoacetophenone derivatives (2-bromoacetophenone, 4-methoxy- $\alpha$ -bromoacetophenone, bromo-3,4-dimethoxyacetophenone). First, the bromoacetophenone derivatives (5 mmol) were added to potassium carbonate (7.5 mmol) in 50 mL of acetone, followed by the slow dropwise addition of the phenolic compounds (6.25 mmol), also dissolved in 50 mL of acetone. The resulting mixture was stirred at reflux for 5 h, then filtered through diatomaceous earth under vacuum and concentrated by rotary evaporation. The residue was dissolved in 20 mL of ethanol and recrystallized to afford white or yellowish crystals.

## 3. Preparation of pre-oxidized poplar lignin

**Extraction of lignin.** Prior to extraction, wood powder was crushed to increase its surface area, thereby enhancing extraction efficiency. The extraction process was carried out in a Soxhlet apparatus. The extraction solution consisted of 400 mL of 1,4-dioxane, 0.9 mL of hydrochloric acid, and 10 mL of deionized water and was heated to boiling point until it became clear and transparent. The mixed solution was then cooled to room temperature and concentrated by rotary evaporation. Subsequently, the concentrate was added to deionized water with an appropriate amount of  $\text{NH}_4\text{Cl}$ . Finally, poplar lignin was obtained by filtration and drying at

room temperature.

**DDQ pre-oxidized lignin.** 0.5 g of poplar lignin and 0.15 g of 2,3-dicyano-5,6-dicyano-1,4-benzoquinone were dissolved in 20 mL of 1,4-dioxane. After O<sub>2</sub> has been circulated for 10 minutes, O<sub>2</sub> was pumped into a high-pressure reactor to maintain a pressure of 1 MPa. The oxidation reaction was conducted at 90 °C for 2 h with stirring at 400 rpm. Next, the mixed solution was cooled to room temperature and concentrated by rotary evaporation. The concentrate was then added to deionized water. Finally, pre-oxidized poplar lignin was obtained by filtration and drying at room temperature.

**Calculation of products from lignin model and lignin material cleavage.**

Lignin models:

$$\text{Yield of product monomer} = \frac{\text{mole of monomer}}{\text{mole of lignin model}} \times 100\%$$

$$\text{Conversion of lignin model} = \left(1 - \frac{\text{mole of residual lignin model}}{\text{mole of lignin model}}\right) \times 100\%$$

Pre-oxidized poplar lignin:

$$\text{Yield of product monomer (wt\%)} = \frac{\text{mole of monomer} \times M}{\text{mass of lignin}} \times 100\%$$

M: Molecular weight of monomer

The mole of every product was calculated by the external standard method of GC.

## Figures and Tables

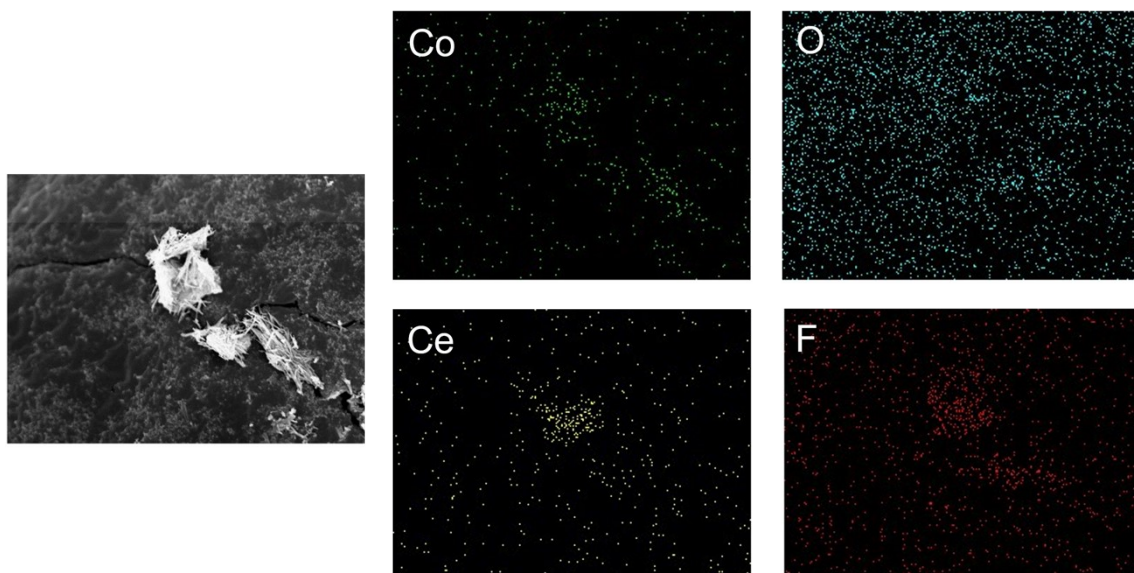

**Fig. S1.** Element mapping images of  $\text{CeF}_3/\text{Co}_3\text{O}_4$ .

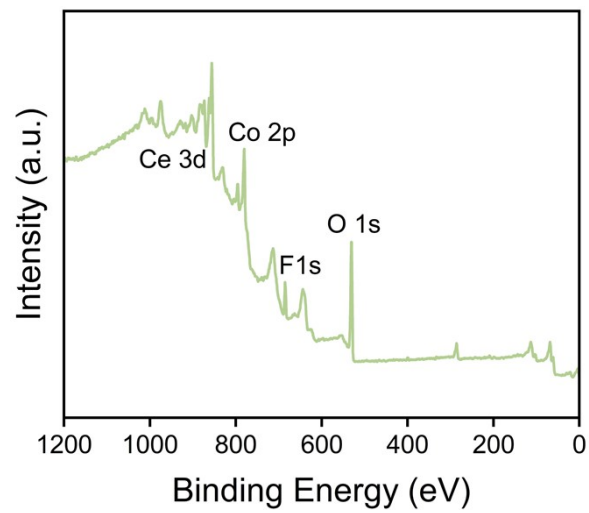

**Fig. S2.** XPS survey spectra of CeF<sub>3</sub>/Co<sub>3</sub>O<sub>4</sub>.

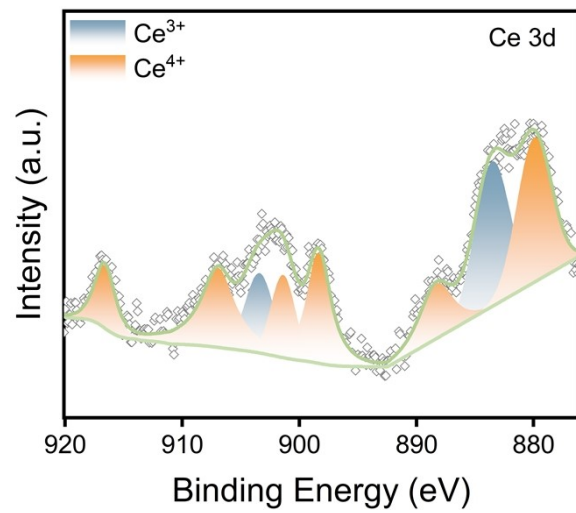

**Fig. S3.** Ce 3d spectra of CeF<sub>3</sub>/Co<sub>3</sub>O<sub>4</sub>.

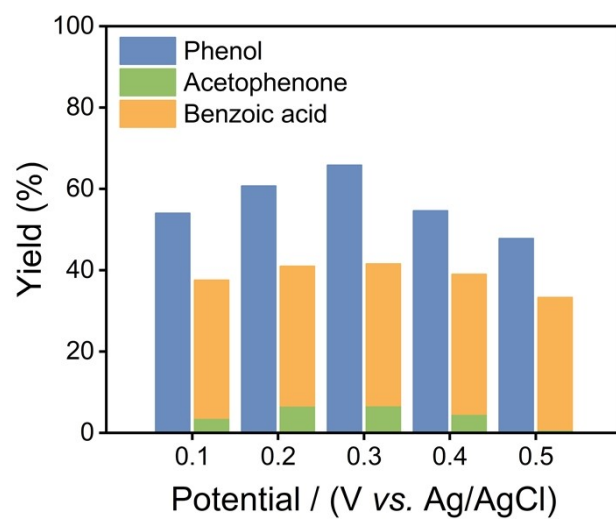

**Fig. S4.** The yield of products of  $\text{Co}_3\text{O}_4$  under different potentials.

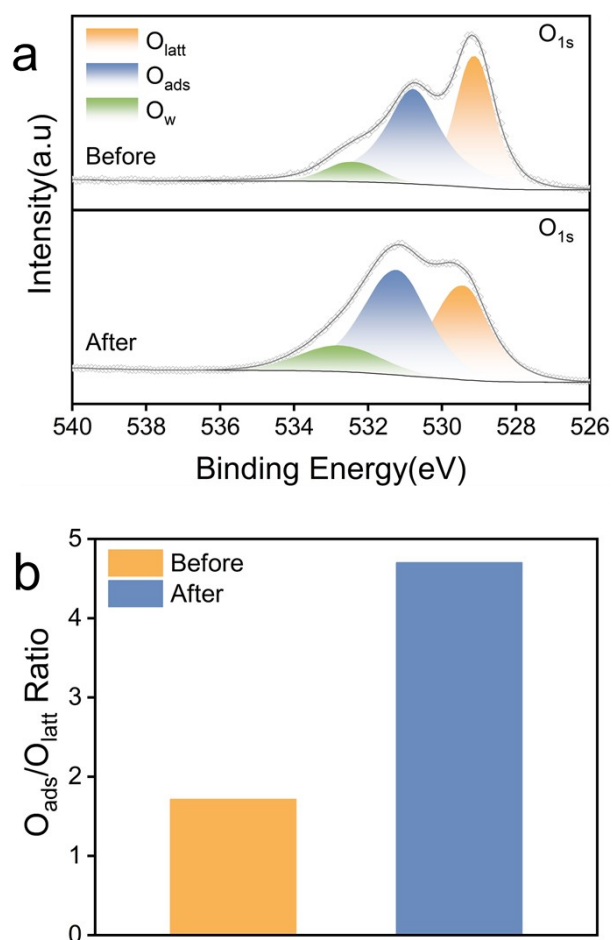

**Fig. S5** (a) O 1s of  $CeF_3/Co_3O_4$  before and after reaction. (b) The ratio of  $O_{ads}/O_{latt}$  before and after reaction.

The transformation from  $Co_3O_4$  to  $CoOOH$  is driven by the rapid accumulation of surface  $OH^*$  species.<sup>2, 3</sup> During alkaline oxygen evolution reaction (OER),  $Co_3O_4$  undergoes an amorphous  $Co(OH)_6$  intermediate state.<sup>4</sup> Owing to the kinetic mismatch between fast  $OH^*$  adsorption and relatively slow deprotonation, the surface coordination structure is further disrupted.<sup>5, 6</sup> Further investigation reveals that surface  $OH^*$  perturbs the charge distribution equilibrium among different cobalt valence states, thereby driving surface reconstruction of the cobalt-based material.<sup>7</sup>

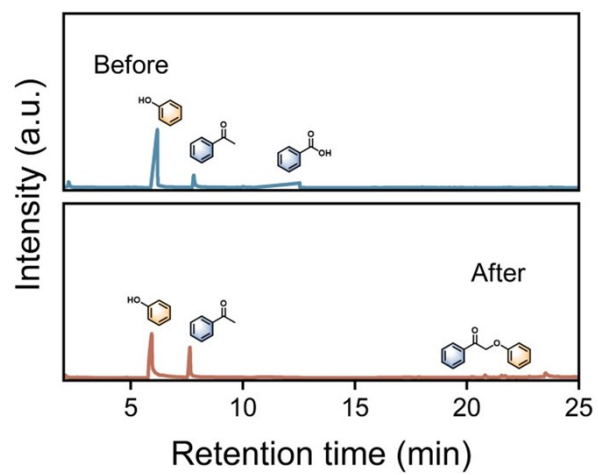

**Fig. S6.** GC of electrocatalytic oxidative reaction solution on  $\text{CeF}_3/\text{Co}_3\text{O}_4$  catalyst with L-Ascorbic acid under standard reaction conditions.

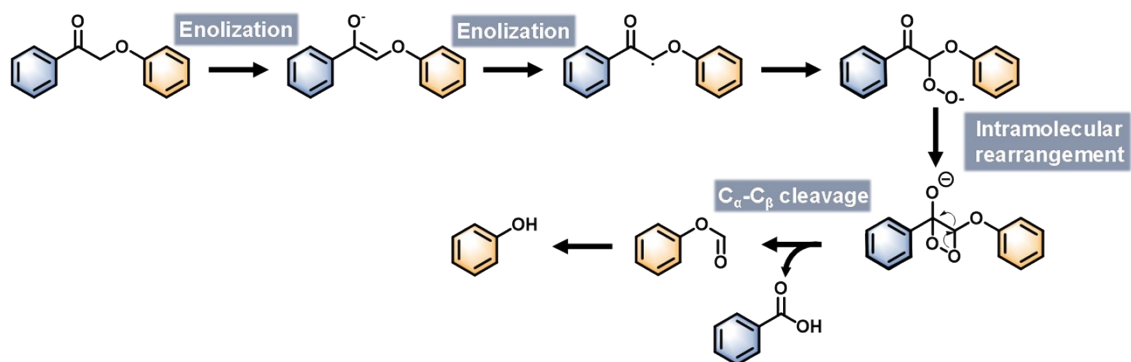

**Fig. S7.** Main reaction pathway of C<sub>α</sub>-C<sub>β</sub> bond cleavage in the PP-one.

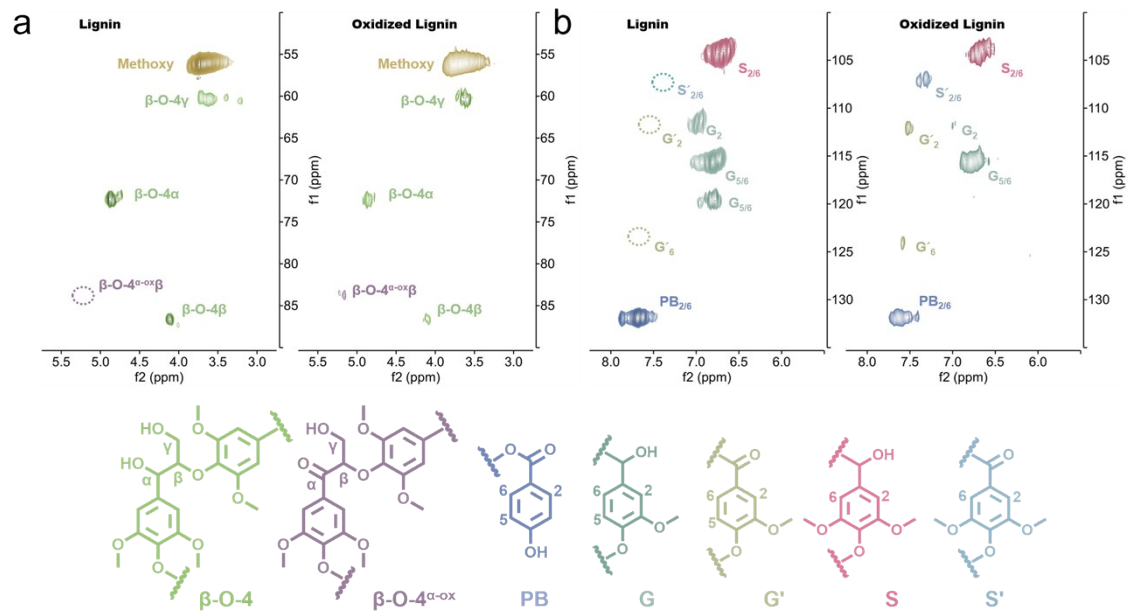

**Fig. S8.** 2D HSQC NMR spectra of poplar lignin before and after oxidation.

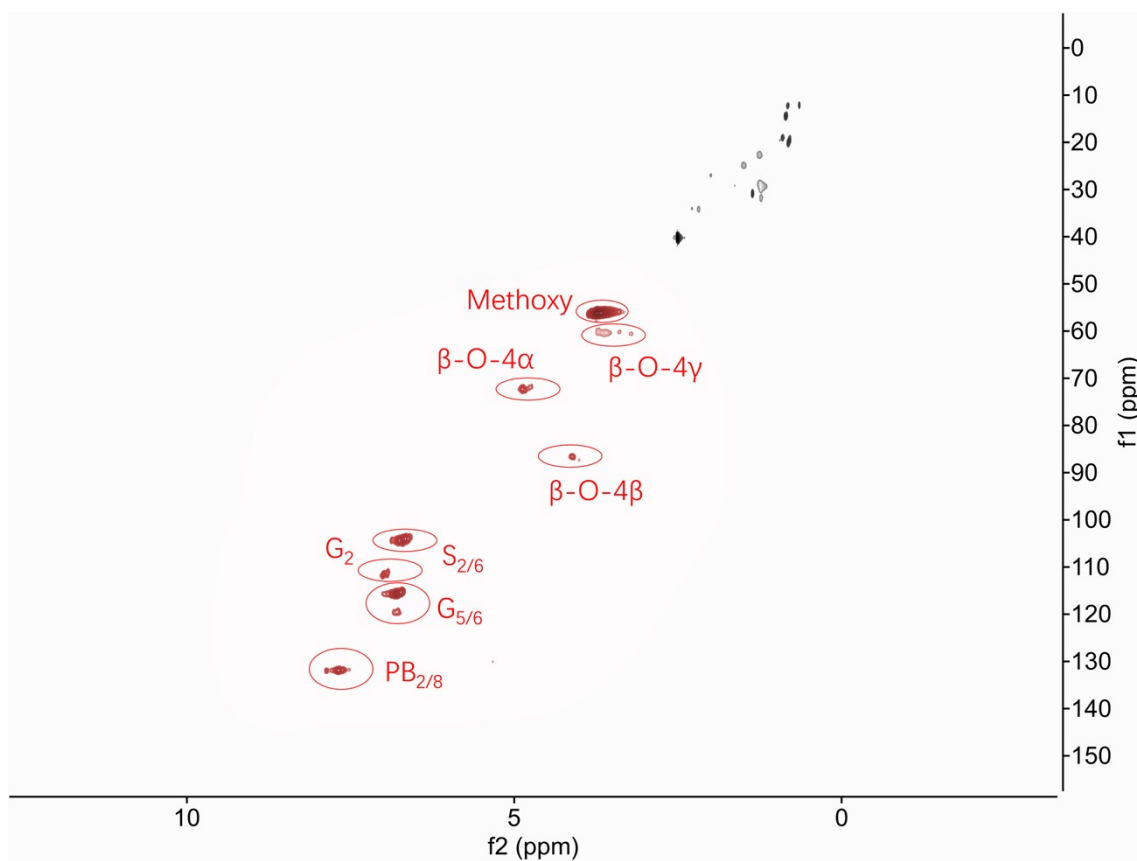

**Fig. S9** The raw 2D HSQC NMR spectrum of poplar lignin before oxidation

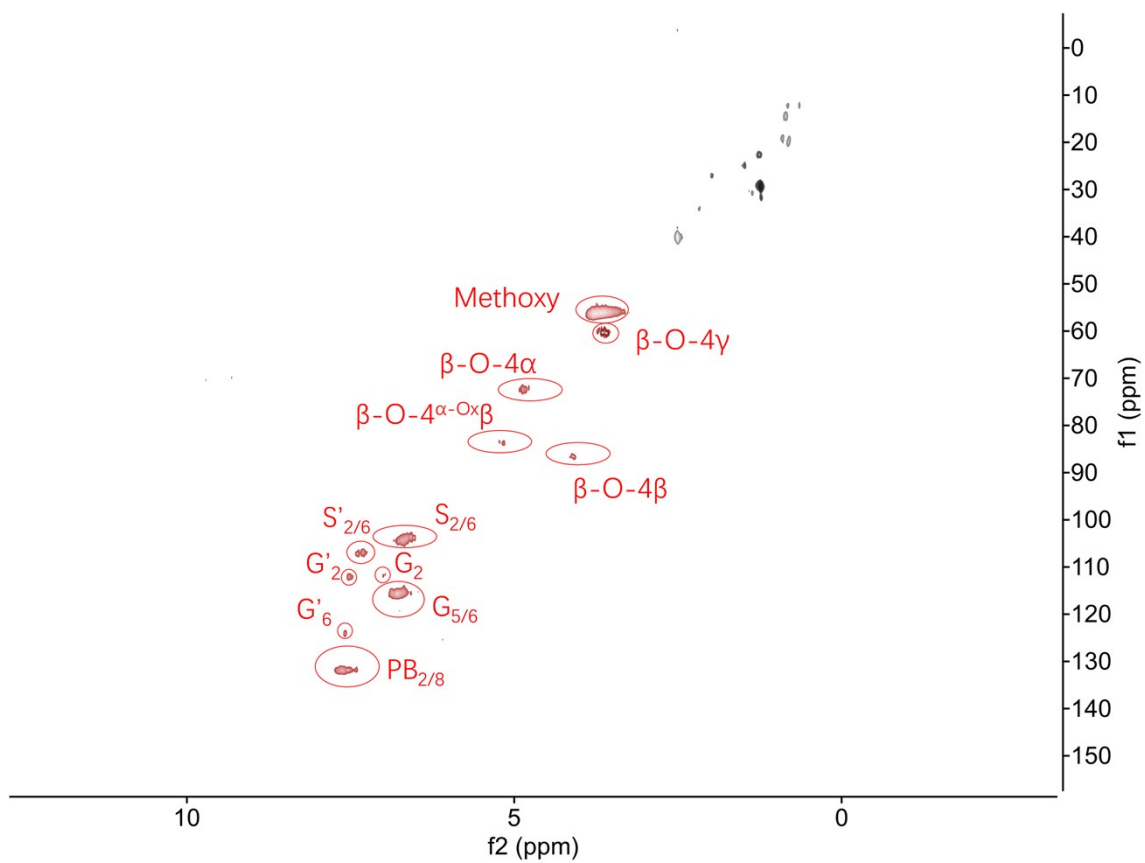

**Fig. S10** The raw 2D HSQC NMR spectrum of poplar lignin after oxidation

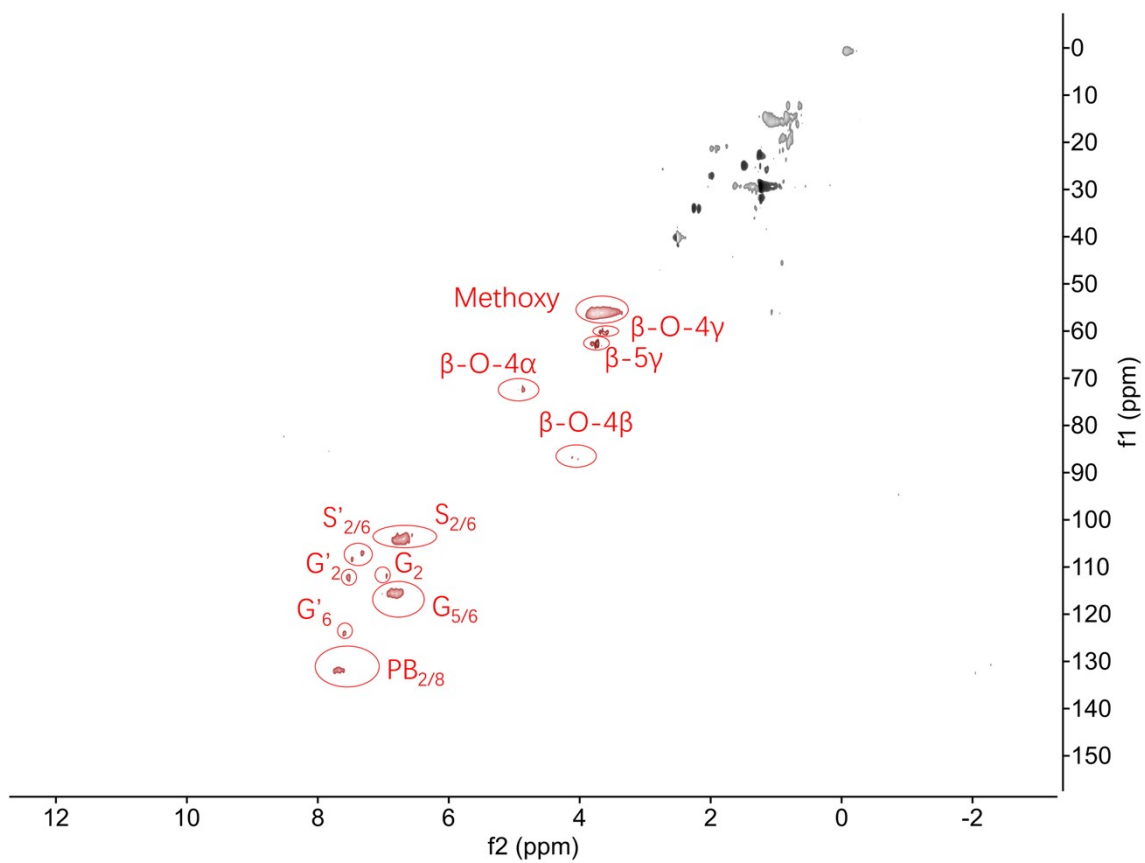

**Fig. S11** The raw 2D HSQC NMR spectrum of poplar lignin after electrocatalytic reaction.

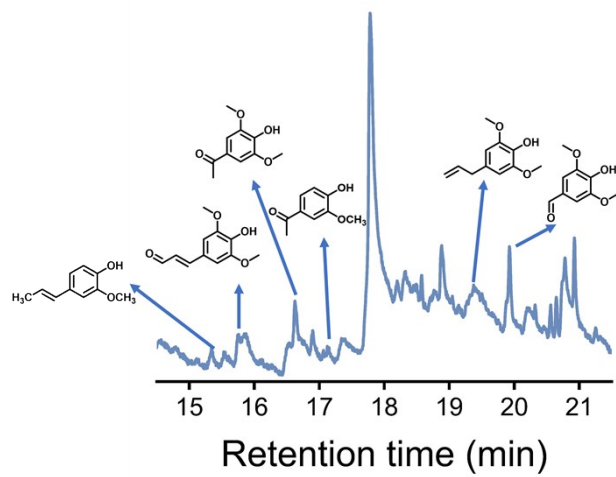

**Fig. S12.** GC–MS chromatograms of the electrocatalytic depolymerization of poplar lignin.

**Table S1.** Comparison of C<sub>β</sub>-O-4 bond cleavage efficiency from 2-phenoxyacetophenone on CeF<sub>3</sub>/Co<sub>3</sub>O<sub>4</sub> with other catalysts.

| Catalyst                                         | Reaction conditions           | Con. (%) | Yield of phenol | Yield of C-C bond cleavage products        | Yield of C-O bond cleavage products | Refs               |
|--------------------------------------------------|-------------------------------|----------|-----------------|--------------------------------------------|-------------------------------------|--------------------|
| CeF <sub>3</sub> /Co <sub>3</sub> O <sub>4</sub> | 0.3 V vs. Ag/AgCl, RT         | ≥99      | 91.21 %         | Benzoic acid 44.66%                        | Acetophenone 11.97%                 | This work          |
| d-CNTs                                           | 0.5 V vs. Ag/AgCl, RT         | 98.79    | 62.31 %         | Benzoic acid 43.42%                        | none                                | Ref. <sup>8</sup>  |
| Pd/CeO <sub>2</sub>                              | 50°C                          | 94.60    | 87.4%           | Benzoic acid 84.5%                         | none                                | Ref. <sup>9</sup>  |
| CTFs                                             | 140°C, 0.5 MPa O <sub>2</sub> | >99      | 56%             | Benzoic acid 4%, Methyl benzoylformate 18% | Methyl benzoate 10%                 | Ref. <sup>10</sup> |
| NiCo-AB MOF                                      | 0.34 V vs. Ag/AgCl, RT        | 97       | 76.3%           | none                                       | Acetophenone 21.7%                  | Ref. <sup>11</sup> |
| CTF-Pdcb-1                                       | 160°C, 0.5 MPa O <sub>2</sub> | >99      | 45.1%           | Benzoic acid 24%, Methyl benzoylformate 8% | Methyl benzoate 14.9%               | Ref. <sup>12</sup> |

**Table S2.** C<sub>β</sub>-O-4 cleavage range of typical lignin models

| Entry    | Substrate Conversion (%)                                                                     | Yield of benzoic acid (%)                                                                    | Yield of phenol (%)                                                                          | Entry     | Substrate Conversion (%)                                                                      | Yield of benzoic acid (%)                                                                      | Yield of phenol (%)                                                                            |
|----------|----------------------------------------------------------------------------------------------|----------------------------------------------------------------------------------------------|----------------------------------------------------------------------------------------------|-----------|-----------------------------------------------------------------------------------------------|------------------------------------------------------------------------------------------------|------------------------------------------------------------------------------------------------|
| <b>1</b> | 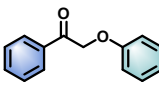<br>≥99     | <br>44.66   | <br>91.21   | <b>6</b>  | <br>99.18   | <br>19.91   | <br>22.31   |
| <b>2</b> | <br>98.13   | <br>29.91   | <br>69.23   | <b>7</b>  | <br>≥99     | <br>32.27   | <br>0.4     |
| <b>3</b> | <br>91.65 | <br>13.03 | <br>63.43 | <b>8</b>  | <br>96.5  | <br>27.46 | <br>46.1  |
| <b>4</b> | <br>98.3  | <br>19.29 | <br>56.62 | <b>9</b>  | <br>99.41 | <br>11.98 | <br>17.12 |
| <b>5</b> | <br>97.69 | <br>10.85 | <br>39.91 | <b>10</b> | <br>99.29 | <br>10.85 | <br>17.71 |

**Table S3.** Comparison of lignin depolymerization performance: our system vs. conventional electrocatalytic systems.

| Catalyst                                           | Reaction conditions              | Yield of monomeric product | Refs               |
|----------------------------------------------------|----------------------------------|----------------------------|--------------------|
| <b>CeF<sub>3</sub>/Co<sub>3</sub>O<sub>4</sub></b> | <b>0.3 V vs. Ag/AgCl, RT</b>     | <b>15.02 wt%</b>           | <b>This work</b>   |
| Pt                                                 | TBHP, 20 mA/cm <sup>2</sup> , RT | 5 wt%                      | Ref. <sup>13</sup> |
| d-CNTs                                             | 0.5 V vs. Ag/AgCl, RT            | 12.41 wt%                  | Ref. <sup>8</sup>  |
| Mo@NiOOH                                           | TBHP, 3.5V vs. Ag/AgCl, RT       | 13 wt%                     | Ref. <sup>14</sup> |
| NiCo-AB MOF                                        | 0.34 V vs. Ag/AgCl, RT           | 12.48wt%                   | Ref. <sup>11</sup> |
| Ni (OH) <sub>2</sub> -V                            | 1.4 V <sub>RHE</sub> , RT        | 14.24 wt%                  | Ref. <sup>15</sup> |
| Au/CuO                                             | 1.0V <sub>RHE</sub> , 40 °C      | 10.8 wt%                   | Ref. <sup>16</sup> |
| Pb/PbO <sub>2</sub>                                | 30 mA/cm <sup>2</sup>            | 3.6 wt%                    | Ref. <sup>17</sup> |
| Ni                                                 | 12.5 mA/cm <sup>2</sup> , 160 °C | 4.2 wt%                    | Ref. <sup>18</sup> |

## References

- 1 J. Li, Z. Li, J. Dong, R. Fang, Y. Chi and C. Hu, *ACS Catal*, 2023, 13, 5272-5284.
- 2 Y. Li, L. Yin, J. Liu, X. Qin, X. Lu, X. Dai, K. Qi, Y. Yang, W. Qi and G. Liu, *Nat Sustainability*, 2025, 8, 1524-1532.
- 3 W. Hu, J. Zhang, Y. Fan, C. Zhao, H. Wang, J. Du, Y. Fang, C. Li, C. Cao, Y. Li, A. Li, Z. Li and C. Li, *J Am Chem Soc*, 2026, 148, 16267-16277.
- 4 R. Zhang, L. Pan, B. Guo, Z.-F. Huang, Z. Chen, L. Wang, X. Zhang, Z. Guo, W. Xu, K. P. Loh and J.-J. Zou, *J Am Chem Soc*, 2023, 145, 2271-2281.
- 5 Z. Xiao, Y.-C. Huang, C.-L. Dong, C. Xie, Z. Liu, S. Du, W. Chen, D. Yan, L. Tao, Z. Shu, G. Zhang, H. Duan, Y. Wang, Y. Zou, R. Chen and S. Wang, *J Am Chem Soc*, 2020, 142, 12087-12095.
- 6 H. B. Tao, Y. Xu, X. Huang, J. Chen, L. Pei, J. Zhang, J. G. Chen and B. Liu, *Joule*, 2019, 3, 1498-1509.
- 7 M. Cui, R. Guo, Y. Zhou, W. Zhao, Y. Liu, W. Luo, Q. Ou and S. Zhang, *ACS Catal*, 2024, 14, 16353-16362.
- 8 J. Zhang, W. Bai, J. Xu, A. Zhou, J. Fan, J. Bi, Q. Zhou, L. Gong, Y. Liu, S. Dou, H. Yu and S. Wang, *Angew Chem Int Ed*, 2025, 64, e202510437.
- 9 Y. Hu, Y. Cui, S. Zhao, X. Zhao, X. Hu, Z. Song, W. Fan and Q. Zhang, *Green Chem*, 2023, 25, 5150-5159.
- 10 G. Zhu, S. Shi, L. Zhao, M. Liu, J. Gao and J. Xu, *ACS Catal*, 2020, 10, 7526-7534.
- 11 W. Bai, X. Wang, J. Xu, Y. Liu, Y. Lou, X. Sun, A. Zhou, H. Li, G. Fu, S. Dou and H. Yu, *Adv Sci*, 2024, 11, 2403431.
- 12 L. Zhao, S. Shi, M. Liu, G. Zhu, M. Wang, W. Du, J. Gao and J. Xu, *Green Chem*, 2018, 20, 1270-1279.
- 13 L. Ma, H. Zhou, X. Kong, Z. Li and H. Duan, *ACS Sustainable Chem Eng*, 2021, 9, 1932-1940.
- 14 J. Xu, J. Meng, Y. Hu, Y. Liu, Y. Lou, W. Bai, S. Dou, H. Yu and S. Wang, *Research*, 2023, 6, 0288.
- 15 Y. Yang, L. Kong, Z. Xia, Y. He, Y. Li, S. Wang and Y. Zou, *J Am Chem Soc*, 2025, 147, 35924-35934.
- 16 C. Wang, Q. Luo, L. Xu, Z. Xia, Y. Zou, Y. Yang, Y. He, S. Wang and Y. Zou, *Adv Mater*, 2025, 37, e08234.
- 17 C. Lan, H. Fan, Y. Shang, D. Shen and G. Li, *Sustainable Energy Fuels*, 2020, 4, 1828-1836.
- 18 M. Zirbes, L. L. Quadri, M. Breiner, A. Stenglein, A. Bomm, W. Schade and S. R. Waldvogel, *ACS Sustainable Chem Eng*, 2020, 8, 7300-7307.
